**S4 Table: List of genes harboring mutations exclusively found in non-metastatic CRC patients included in cluster 0**

| <b>Gene name</b>    |
|---------------------|
| <i>OR5C1</i>        |
| <i>LOC107985532</i> |
| <i>MAP7D2</i>       |
| <i>SNORD116-29</i>  |
| <i>NMS</i>          |
| <i>GOLGA7</i>       |
| <i>SNORD3B-1</i>    |
| <i>LINC01098</i>    |
| <i>NKX2-4</i>       |
| <i>MIR17HG</i>      |
| <i>IGF2-AS</i>      |
| <i>GIP</i>          |
| <i>CBWD6</i>        |
| <i>MIR889</i>       |
| <i>CCDC163</i>      |
